# Supplementary material for: Study of Tribological Properties of Fullerenol and Nanodiamonds as Additives in Water-Based Lubricants for Amorphous Carbon (a-C) Coatings
Source: MDPI journal article supplement (doi:10.3390/nano12010139), 2021-12-31
Supplement: s1 [file s1]

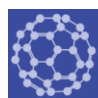

Supplementary Material

# Study of Tribological Properties of Fullerenol and Nanodiamonds as Additives in Water-Based Lubricants for Amorphous Carbon (a-C) Coatings

Shuqing Chen <sup>1,\*</sup>, Qi Ding <sup>2</sup>, Yan Gu <sup>1</sup>, Xin Quan <sup>1</sup>, Ying Ma <sup>1</sup>, Yulong Jia <sup>1</sup>, Hongmei Xie <sup>1</sup> and Jinzhu Tang <sup>1,\*</sup>

<sup>1</sup> College of Materials Science and Engineering, Yangtze Normal University, Chongqing 408100, China; 20170054@yznu.edu.cn (Y.G.); quanxinjianshe@163.com (X.Q.); yma2017@126.com (Y.M.); yljia2017@126.com (Y.J.); xiehongmei@yznu.cn (H.X.)

<sup>2</sup> State Key Laboratory of Solid Lubrication, Lanzhou Institute of Chemical Physics, Chinese Academy of Sciences, Lanzhou 730000, China; dingqi@licp.cas.cn

\* Correspondence: chenshuqing2021@163.com (S.C.); tangjinzhu11@163.com (J.T.); Tel.: +86-15023512606 (S.C.); +86-18875480116 (J.T.)

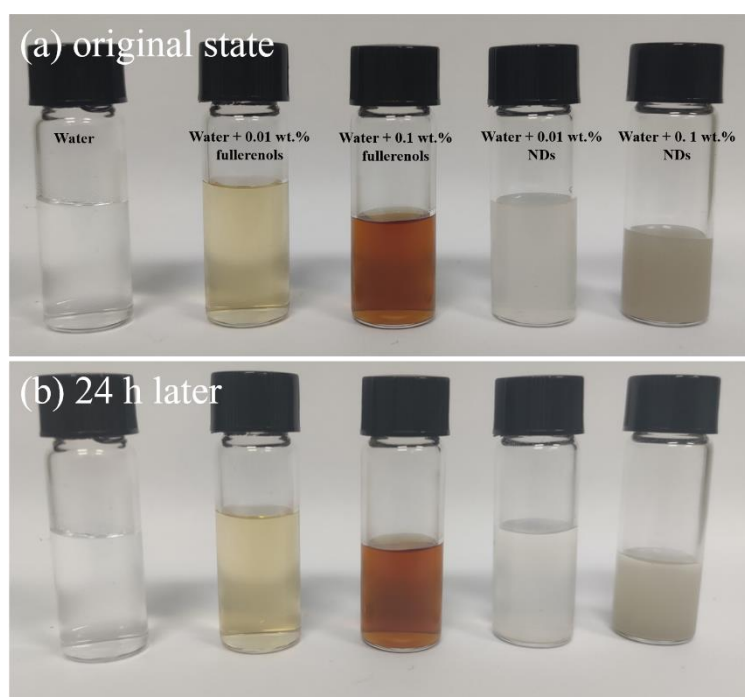

**Figure S1.** (a,b) Digital images of dispersion of fullerenol and nanodiamonds in water with various concentrations (c, wt%). The time for each picture is noted on the respective picture.

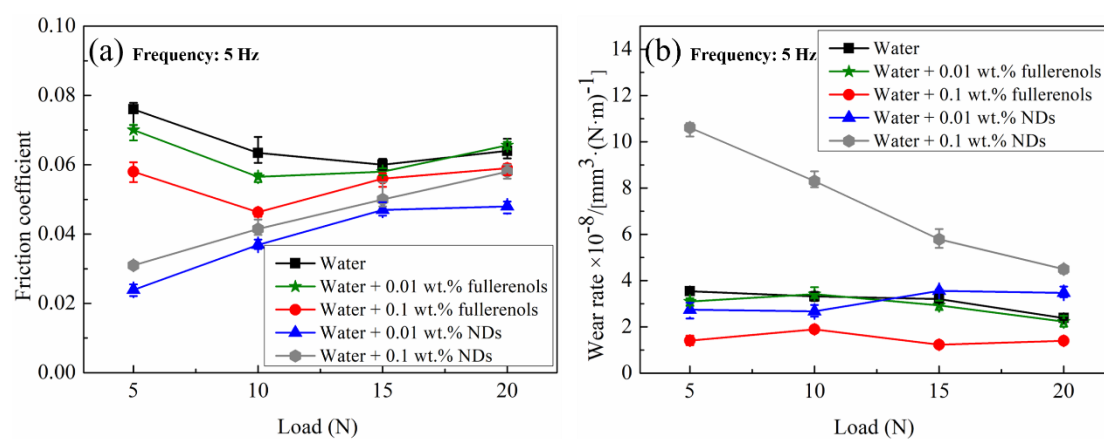

**Figure S2.** (a) Variation of COF with normal load and (b) variation of wear rate with normal load.
